# Supplementary material for: AtRTD – a comprehensive reference transcript dataset resource for accurate quantification of transcript‐specific expression in Arabidopsis thaliana
Source: PubMed Central journal article supplement (PMC4744958; doi:10.1111/nph.13545), 2015-06-25
Supplement: NPH-208-96-s001.pdf [file NPH-208-96-s001.pdf]

## **New Phytologist Supporting Information**

Article title: AtRTD - A comprehensive Reference Transcript Dataset resource for accurate quantification of transcript-specific expression in *Arabidopsis thaliana*

Authors: Runxuan Zhang, Cristiane P. G. Calixto, Nikoleta A. Tzioutziou, Allan James, Craig G. Simpson, Wenbin Guo, Yamile Marquez, Maria Kalyna, Rob Patro, Eduardo Eyras, Andrea Barta, Hugh Nimmo and John W. S. Brown

Article acceptance date: 05 June 2015

The following Supporting Information is available for this article:

**Table S1** Transcript complexity of AtRTD: Distribution of the number of transcripts per gene

| <b>No. of transcripts per gene</b> | <b>No. of genes</b> |              |
|------------------------------------|---------------------|--------------|
|                                    | <b>TAIR 10</b>      | <b>AtRTD</b> |
| 1                                  | 27717               | 18948        |
| 2                                  | 4318                | 6036         |
| 3                                  | 1144                | 3142         |
| 4                                  | 293                 | 1920         |
| 5                                  | 90                  | 1237         |
| 6                                  | 26                  | 742          |
| 7                                  | 7                   | 494          |
| 8                                  | 5                   | 325          |
| 9                                  | 1                   | 224          |
| 10                                 | 1                   | 131          |
| 11                                 |                     | 112          |
| 12                                 |                     | 74           |
| 13                                 |                     | 66           |
| 14                                 |                     | 35           |
| 15                                 |                     | 38           |
| 16                                 |                     | 27           |
| 17                                 |                     | 9            |
| 18                                 |                     | 13           |
| 19                                 |                     | 10           |
| 20                                 |                     | 6            |
| 21                                 |                     | 11           |
| 22                                 |                     | 5            |
| 23                                 |                     | 4            |
| 24                                 |                     | 3            |
| 25                                 |                     | 3            |
| 26                                 |                     | 2            |
| 28                                 |                     | 3            |
| 29                                 |                     | 1            |
| 34                                 |                     | 1            |
| 36                                 |                     | 1            |
| 40                                 |                     | 1            |
| 47                                 |                     | 1            |
| Total                              | 33602               | 33625        |
